# Supplementary material for: Clinical and Clinical Pathological Presentation of 310 Dogs Affected by Lymphoma with Aberrant Antigen Expression Identified via Flow Cytometry
Source: MDPI journal article supplement (doi:10.3390/vetsci9040184), 2022-04-13
Supplement: s1 [file s1]

**Table S2** number and frequencies of clinical and clinical-pathological features of 101 dogs with T-zone lymphoma with aberrant antigen expression.

|                        | Number of aberrant cases out of total cases tested for the antigen |          |       |       |       |      |          |
|------------------------|--------------------------------------------------------------------|----------|-------|-------|-------|------|----------|
|                        | CD21+                                                              | CD4-CD8- | CD3-  | CD44- | CD34+ | CD5- | CD4+CD8+ |
| Pure breed             | 46/70                                                              | 22/70    | 13/63 | 0/52  | 0/71  | 0/73 | 3/70     |
| Mixed breed            | 19/24                                                              | 7/21     | 1/19  | 2/19  | 1/23  | 0/23 | 0/21     |
| Males                  | 34/48                                                              | 10/45    | 9/41  | 0/37  | 0/48  | 0/48 | 2/45     |
| Females                | 31/46                                                              | 19/46    | 5/41  | 2/33  | 1/46  | 0/48 | 1/46     |
| Substage a             | 32/51                                                              | 16/50    | 8/44  | 1/37  | 0/51  | 0/53 | 1/50     |
| Substage b             | 10/12                                                              | 4/12     | 2/11  | 0/10  | 0/12  | 0/12 | 0/12     |
| Peripheral LNs         | 49/69                                                              | 19/67    | 10/58 | 1/51  | 0/69  | 0/72 | 3/67     |
| Intracavitary LNs      | 0/1                                                                | -        | 0/1   | 0/1   | -     | -    | -        |
| TZL                    | 9/13                                                               | 2/13     | 0/10  | 0/10  | 0/14  | 0/15 | 0/13     |
| Epitheliotropic        | 0/1                                                                | 1/1      | 1/1   | -     | -     | 0/1  | 0/1      |
| T-cell, undefined      | 0/1                                                                | 0/1      | 0/1   | 0/1   | -     | 0/1  | 0/1      |
| Spleen positive        | 7/12                                                               | 0/10     | 0/9   | 0/8   | 0/11  | 0/12 | 0/10     |
| Spleen negative        | 7/10                                                               | 3/11     | 3/8   | 0/5   | 0/10  | 0/11 | 0/11     |
| Liver positive         | 7/11                                                               | 0/9      | 0/7   | 0/7   | 0/10  | 0/10 | 0/9      |
| Liver negative         | 7/11                                                               | 3/12     | 3/11  | 0/6   | 0/11  | 0/13 | 0/12     |
| No extranodal site     | 9/15                                                               | 2/15     | 3/13  | 1/13  | 0/16  | 0/17 | 0/15     |
| Oral cavity            | 5/6                                                                | 0/5      | 0/5   | 0/4   | 0/6   | 0/6  | 0/5      |
| Skin                   | 4/7                                                                | 4/7      | 1/7   | 0/4   | 0/6   | 0/7  | 0/7      |
| Bowel                  | 1/1                                                                | 1/1      | 0/1   | -     | 0/1   | 0/1  | 0/1      |
| Multiple sites         | 1/1                                                                | 0/2      | 0/2   | 0/2   | 0/2   | 0/2  | 0/2      |
| Other single site      | 1/1                                                                | 1/1      | 0/1   | 0/1   | 0/1   | 0/1  | 0/1      |
| Concomitant disease    | 7/10                                                               | 1/12     | 1/10  | 0/8   | 0/12  | 0/12 | 0/12     |
| No concomitant disease | 12/18                                                              | 5/17     | 3/16  | 1/13  | 0/16  | 0/18 | 0/17     |
| Anemia                 | 14/20                                                              | 4/18     | 2/14  | 0/13  | 0/20  | 0/20 | 0/18     |
| No anemia              | 36/55                                                              | 18/54    | 9/49  | 1/39  | 0/64  | 0/56 | 1/54     |
| Thrombocytopenia       | 9/10                                                               | 3/10     | 2/8   | 0/6   | 0/10  | 0/10 | 0/10     |
| Normal PLT count       | 42/66                                                              | 19/63    | 9/56  | 1/47  | 0/65  | 0/67 | 1/63     |
| Leukocytosis           | 17/27                                                              | 9/25     | 2/21  | 1/22  | 0/26  | 0/26 | 0/25     |
| Normal WBC count       | 32/47                                                              | 13/47    | 9/42  | 0/31  | 0/47  | 0/49 | 2/47     |
| Leukopenia             | 2/2                                                                | 0/1      | 0/1   | -     | 0/2   | 0/2  | 0/1      |

LN=lymph node. TZL=T-zone Lymphoma
