# Supplementary material for: Clinical and Clinical Pathological Presentation of 310 Dogs Affected by Lymphoma with Aberrant Antigen Expression Identified via Flow Cytometry
Source: MDPI journal article supplement (doi:10.3390/vetsci9040184), 2022-04-13
Supplement: s1 [file s1]

**Table S4** age, blood and marrow infiltration in 310 dogs with lymphoma with aberrant antigen expression, according to lymphoma subtype.

| Aberrancy               |         | Median; min-max |                     |                     |
|-------------------------|---------|-----------------|---------------------|---------------------|
|                         |         | Age (years)     | PB infiltration (%) | BM infiltration (%) |
| <b>T-NOS lymphoma</b>   |         |                 |                     |                     |
| Loss of CD5             | Present | 7; 3-13         | 2.8; 0.1-60.0       | 1.2; 0.1-72.5       |
|                         | Absent  | 8; 1-16         | 2.9; 0.1-68.0       | 1.2; 0.1-80.1       |
| CD4/CD8 double negative | Present | 8; 1-14         | 1.4; 0.1-60.0       | 0.9; 0.1-44.8       |
|                         | Absent  | 8; 1-16         | 3.2; 0.1-68.0       | 1.5; 0.1-80.1       |
| Loss of CD3             | Present | 8; 1-16         | 2.9; 0.1-40.0       | 1.0; 0.1-80.1       |
|                         | Absent  | 8; 1-14         | 2.9; 0.1-68.0       | 1.3; 0.1-72.5       |
| Loss of CD45            | Present | 9; 5-12         | 13.6; 0.1-40.3      | 1.2; 0.1-44.8       |
|                         | Absent  | 8; 1-16         | 2.7; 0.1-68.0       | 1.1; 0.1-80.1       |
| Loss of CD44            | Present | 8.5; 1-16       | 3.4; 0.1-24.2       | 1.2; 0.9-20.0       |
|                         | Absent  | 8; 1-14         | 5.8; 0.1-60.0       | 5.3; 0.1-80.1       |
| Expression of CD34      | Present | 4               | 1.9                 | 0.9                 |
|                         | Absent  | 8; 1-14         | 2.9; 0.1-68.0       | 1.9; 0.1-80.1       |
| CD4/CD8 double positive | Present | 9; 1-16         | 2.9; 0.1-68.0       | 1.1; 0.1-3.3        |
|                         | Absent  | 8; 1-14         | 2.7; 0.1-60.0       | 1.2; 0.1-80.1       |
| Expression of CD21      | Present | 8               | -                   | -                   |
|                         | Absent  | 8; 1-16         | 2.9; 0.1-68.0       | 1.1; 0.1-80.1       |
| <b>T-zone lymphoma</b>  |         |                 |                     |                     |
| Expression of CD21      | Present | 9; 4-14         | 25.8; 0.1-88.4      | 3.7; 0.1-28.0       |
|                         | Absent  | 11; 5-15        | 17.0; 0.1-77.0      | 2.0; 0.1-46.4       |
| CD4/CD8 double negative | Present | 10; 5-14        | 25.0; 1.2-77.0      | 4.5; 0.1-46.4       |
|                         | Absent  | 10; 4-14        | 23.9; 0.1-88.4      | 2.0; 0.1-28.0       |
| Loss of CD3             | Present | 9; 4-12         | 16.5; 0.1-77.0      | 0.2; 0.1-2.5        |
|                         | Absent  | 10; 5-14        | 28.3; 2.0-77.0      | 4.8; 0.1-46.4       |
| Loss of CD44            | Present | 12, 12          | -                   | -                   |
|                         | Absent  | 9; 5-14         | 31.8; 0.9-88.4      | 2.8; 0.1-46.4       |
| Expression of CD34      | Present | 12              | -                   | -                   |
|                         | Absent  | 10; 4-15        | 22.8; 0.1-88.4      | 2.6; 0.1-46.4       |
| Loss of CD5             | Present | -               | -                   | -                   |
|                         | Absent  | 10; 4-15        | 22.0; 0.1-88.4      | 2.7; 0.1-46.4       |
| CD4/CD8 double positive | Present | 11; 6-14        | 0.1                 | -                   |
|                         | Absent  | 10; 4-14        | 25.4; 0.1-88.4      | 2.5; 0.1-46.4       |
| <b>B-cell lymphoma</b>  |         |                 |                     |                     |
| Expression of CD34      | Present | 8; 3-13         | 0.9; 0.1-49.8       | 2.2; 0.1-22.1       |
|                         | Absent  | 10; 3-15        | 1.9; 0.2-32.4       | 3.9; 2.3-5.4        |
| Loss of CD44            | Present | 8; 6-13         | 1.2; 0.9-1.4        | -                   |
|                         | Absent  | 8; 3-12         | 0.9; 0.1-15.4       | 2.5; 0.1-15.5       |
| Expression of CD5       | Present | 12.5; 7-15      | 2.5; 0.2-32.4       | 3.9; 2.7-5.4        |
|                         | Absent  | 8; 3-13         | 0.9; 0.1-49.8       | 2.9; 0.1-22.1       |
| Loss of CD45            | Present | 8; 3-10         | 2.4; 0.9-4.1        | 2.3; 0.9-4.3        |

|                   |         |         |               |               |
|-------------------|---------|---------|---------------|---------------|
|                   | Absent  | 8; 3-15 | 1.2; 0.1-49.8 | 3.5; 0.1-22.1 |
| Expression of CD3 | Present | -       | 2.3           | -             |
|                   | Absent  | 8; 3-14 | 1.4; 0.1-15.4 | 3.4; 0.1-15.5 |
| Expression of CD4 | Present | 6       | -             | -             |
|                   | Absent  | 8; 3-15 | 1.4; 0.1-41.0 | 3.7; 0.1-22.1 |
| Expression of CD8 | Present | 6       | -             | -             |
|                   | Absent  | 8; 3-15 | 1.4; 0.1-41.0 | 3.7; 0.1-22.1 |

T-NOS= T-cell lymphoma not otherwise specified. PB=peripheral blood. BM=bone marrow.
