# Supplementary material for: Clinical and Clinical Pathological Presentation of 310 Dogs Affected by Lymphoma with Aberrant Antigen Expression Identified via Flow Cytometry
Source: MDPI journal article supplement (doi:10.3390/vetsci9040184), 2022-04-13
Supplement: s1 [file s1]

**Table S1** number and frequencies of clinical and clinical-pathological features of 152 dogs with T-cell lymphoma not otherwise specified with aberrant antigen expression.

|                        | Number of aberrant cases out of total cases tested for the antigen |          |        |       |       |       |          |       |
|------------------------|--------------------------------------------------------------------|----------|--------|-------|-------|-------|----------|-------|
|                        | CD5-                                                               | CD4-CD8- | CD3-   | CD45- | CD44- | CD34+ | CD4+CD8+ | CD21+ |
| Pure breed             | 64/108                                                             | 39/112   | 23/110 | 7/116 | 10/53 | 1/96  | 13/112   | 1/115 |
| Mixed breed            | 17/28                                                              | 11/28    | 8/28   | 1/28  | 2/12  | 0/24  | 3/28     | 0/27  |
| Males                  | 48/76                                                              | 25/76    | 16/74  | 4/78  | 9/34  | 1/67  | 9/76     | 1/77  |
| Females                | 33/61                                                              | 25/65    | 16/64  | 4/67  | 3/30  | 0/53  | 7/65     | 0/66  |
| Substage a             | 46/69                                                              | 21/71    | 11/66  | 2/71  | 4/33  | 1/58  | 7/71     | 1/71  |
| Substage b             | 16/36                                                              | 17/34    | 11/36  | 3/38  | 4/19  | 0/32  | 5/34     | 0/37  |
| No LN enlargement      | 4/4                                                                | 1/3      | 0/1    | 0/4   | 1/2   | 0/1   | 0/3      | 0/4   |
| Peripheral LNs         | 58/89                                                              | 26/90    | 17/90  | 4/92  | 6/47  | 1/81  | 10/90    | 1/92  |
| Intracavitary LNs      | 5/17                                                               | 10/17    | 6/17   | 1/18  | 2/7   | 0/15  | 3/17     | 0/18  |
| PTCL                   | 7/9                                                                | 6/8      | 2/9    | 0/9   | 0/4   | 0/7   | 1/8      | 0/9   |
| Mycosis fungoides      | 2/2                                                                | 0/2      | 1/1    | 0/2   | 0/1   | -     | 0/2      | 0/2   |
| Small lymphocytic      | 0/2                                                                | 2/2      | 0/2    | 0/2   | 0/1   | 0/2   | 0/2      | 0/2   |
| Non-epitheliotropic    | 1/1                                                                | 0/1      | -      | 0/1   | -     | -     | 0/1      | 0/1   |
| Lymphoblastic          | 0/1                                                                | 0/1      | 0/1    | 0/1   | 1/1   | 0/1   | 1/1      | 0/1   |
| Spleen positive        | 9/14                                                               | 5/15     | 2/14   | 0/15  | 1/5   | 0/13  | 2/15     | 0/14  |
| Spleen negative        | 17/27                                                              | 10/25    | 5/23   | 0/27  | 1/10  | 0/20  | 2/25     | 0/27  |
| Liver positive         | 7/13                                                               | 6/14     | 3/13   | 0/14  | 1/7   | 0/13  | 2/14     | 0/14  |
| Liver negative         | 17/27                                                              | 9/25     | 5/23   | 0/27  | 1/9   | 0/20  | 2/25     | 0/27  |
| No extranodal site     | 12/18                                                              | 3/19     | 5/18   | 1/19  | 0/7   | 0/18  | 1/19     | 0/19  |
| Oral cavity            | 1/5                                                                | 3/6      | 1/6    | 0/6   | 0/1   | 0/4   | 2/6      | 0/6   |
| Skin                   | 9/13                                                               | 8/13     | 3/11   | 0/13  | 0/3   | 0/7   | 0/13     | 0/13  |
| Bowel                  | 2/3                                                                | 1/2      | 0/2    | 0/3   | 1/2   | 0/2   | 0/2      | 0/3   |
| Mediastinum            | 8/12                                                               | 5/13     | 0/11   | 0/13  | 1/6   | 0/10  | 2/13     | 0/13  |
| Effusion               | 3/12                                                               | 7/13     | 6/13   | 1/13  | 3/4   | 0/13  | 4/13     | 0/12  |
| Multiple sites         | 3/5                                                                | 1/3      | 2/4    | 0/5   | 1/2   | 0/3   | 2/3      | 0/5   |
| Other single site      | 1/1                                                                | 0/1      | 0/1    | 0/1   | -     | 0/1   | 0/1      | 0/1   |
| Concomitant disease    | 5/8                                                                | 5/10     | 2/10   | 1/10  | 0/6   | 0/7   | 0/10     | 0/10  |
| No concomitant disease | 22/37                                                              | 14/37    | 9/35   | 1/40  | 2/13  | 0/30  | 6/37     | 0/40  |
| Anemia                 | 18/33                                                              | 12/32    | 9/33   | 1/35  | 3/16  | 0/28  | 3/32     | 0/35  |
| No anemia              | 48/78                                                              | 26/81    | 17/78  | 3/82  | 6/37  | 1/69  | 9/81     | 0/80  |
| Thrombocytopenia       | 29/46                                                              | 14/46    | 10/44  | 1/47  | 2/18  | 1/40  | 5/46     | 0/46  |
| Normal PLT count       | 34/62                                                              | 24/64    | 16/64  | 3/67  | 7/33  | 0/55  | 7/64     | 0/66  |
| Leukocytosis           | 17/31                                                              | 15/33    | 11/32  | 1/33  | 2/12  | 0/28  | 1/33     | 0/32  |
| Normal WBC count       | 45/76                                                              | 20/74    | 14/73  | 3/78  | 6/38  | 1/64  | 11/74    | 0/77  |
| Leukopenia             | 4/4                                                                | 3/6      | 1/6    | 0/6   | 1/3   | 0/5   | 0/6      | 0/6   |

LN=lymph node. PTCL=Peripheral T-Cell Lymphoma
