# Supplementary material for: Clinical and Clinical Pathological Presentation of 310 Dogs Affected by Lymphoma with Aberrant Antigen Expression Identified via Flow Cytometry
Source: MDPI journal article supplement (doi:10.3390/vetsci9040184), 2022-04-13

## Supplementary Figure S3

Clinical and clinical-pathological data of 54 dogs diagnosed with B-cell lymphoma, according to specific phenotypic aberrancies

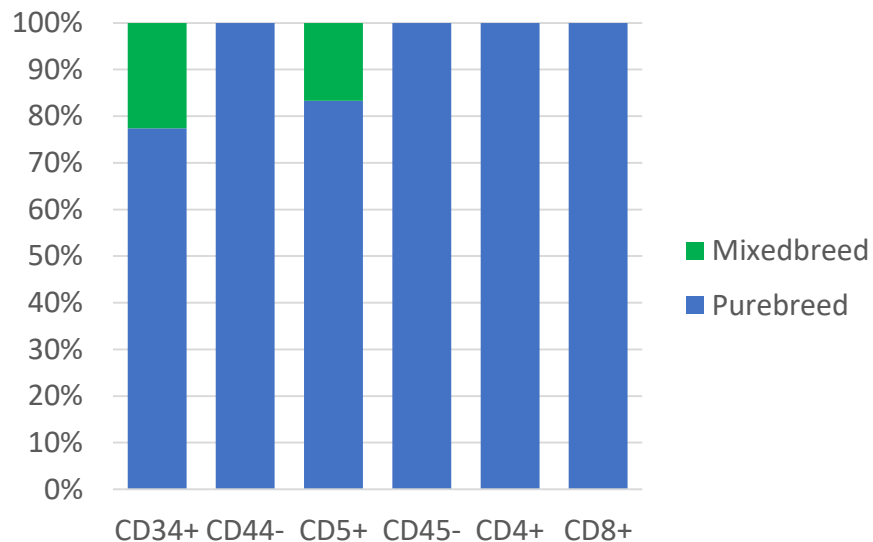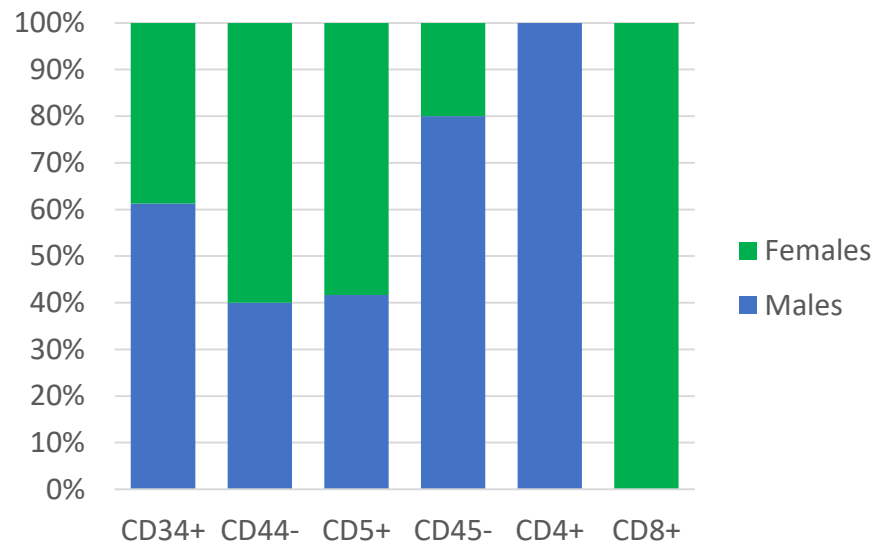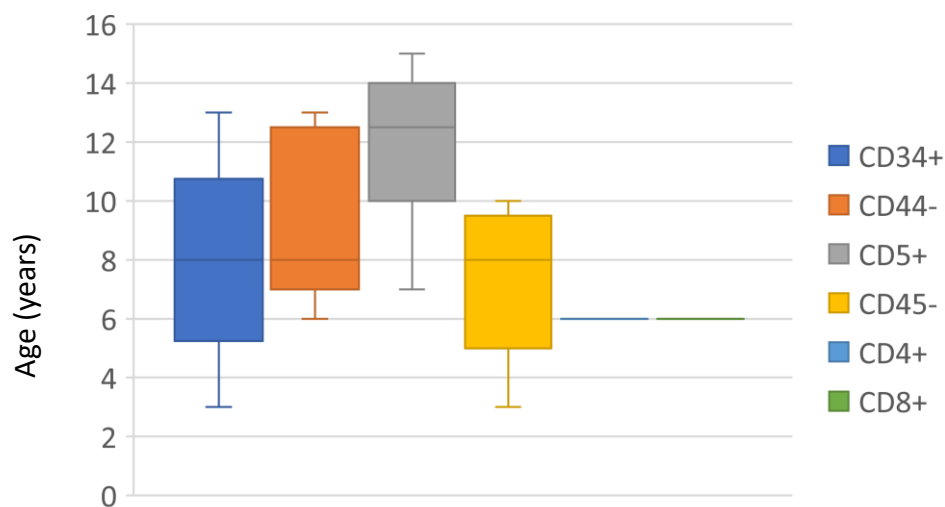

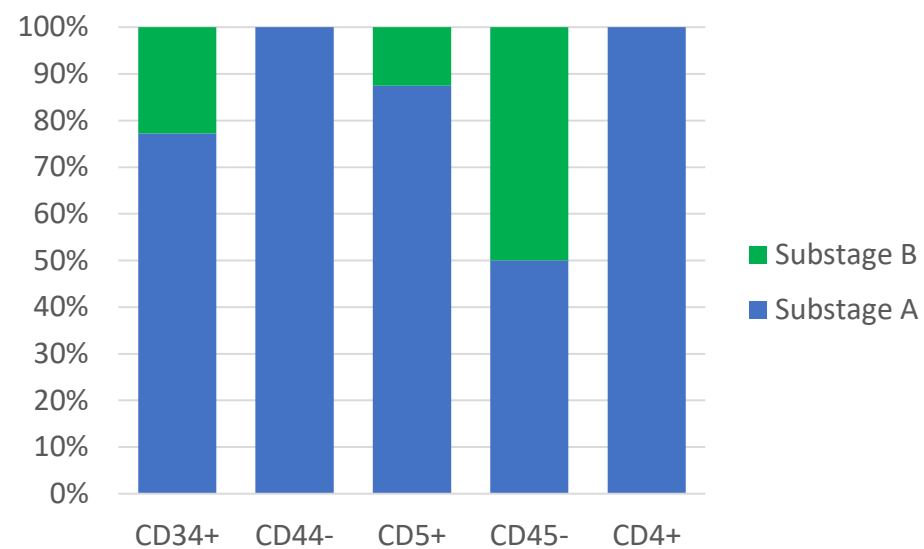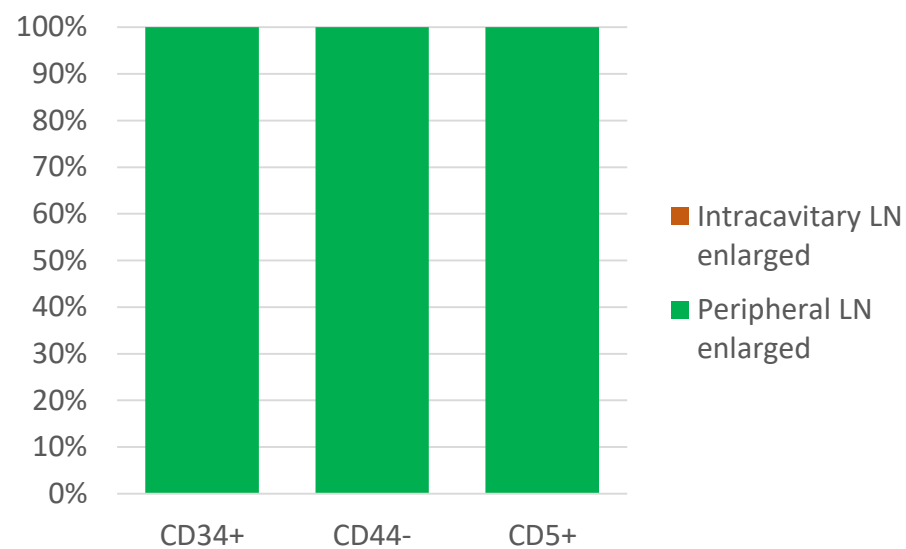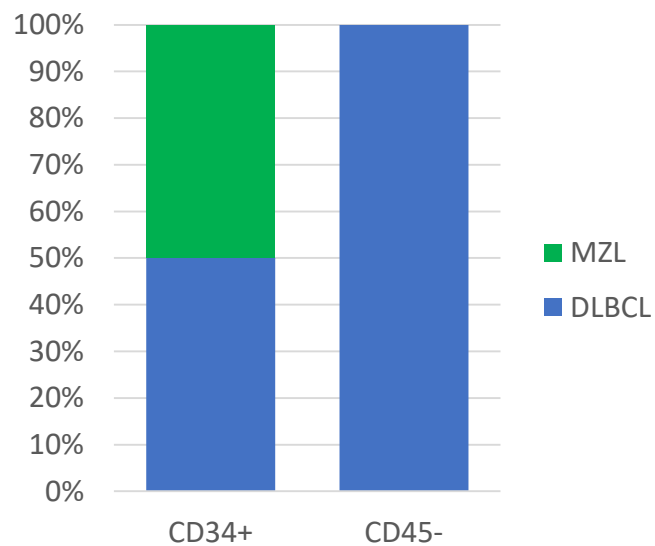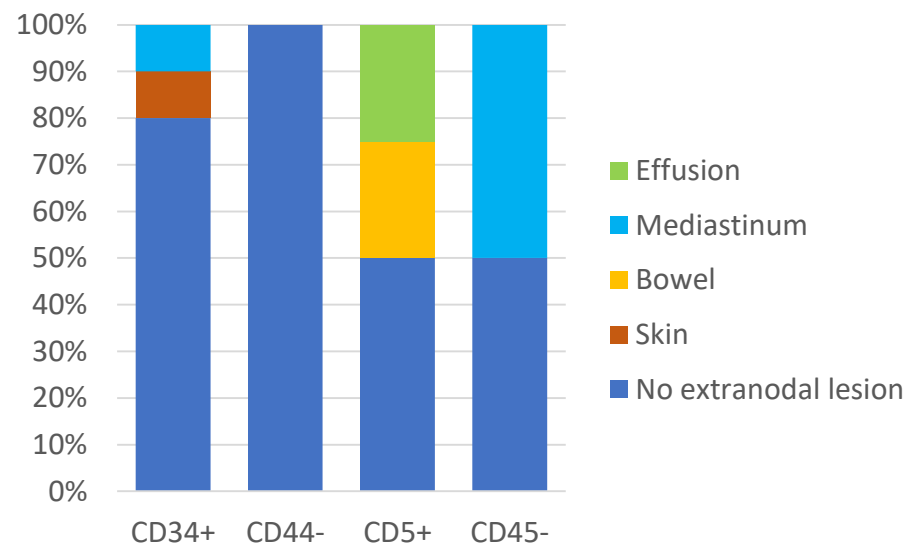

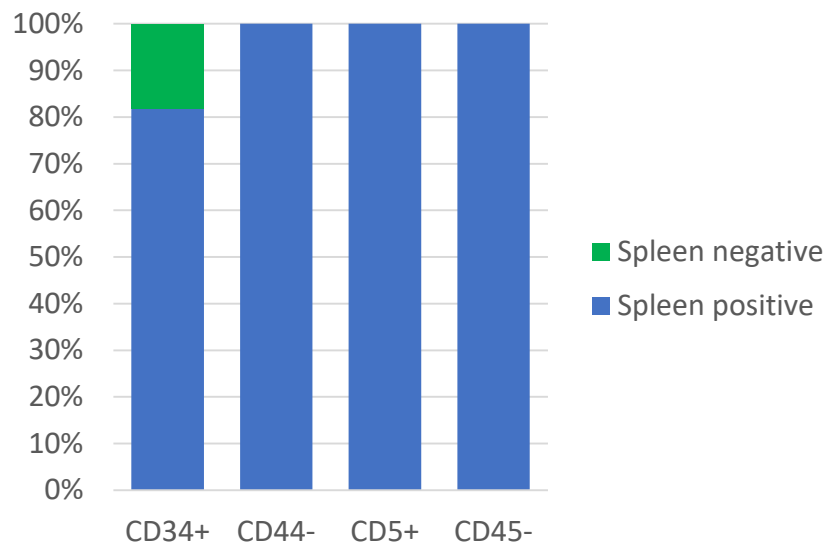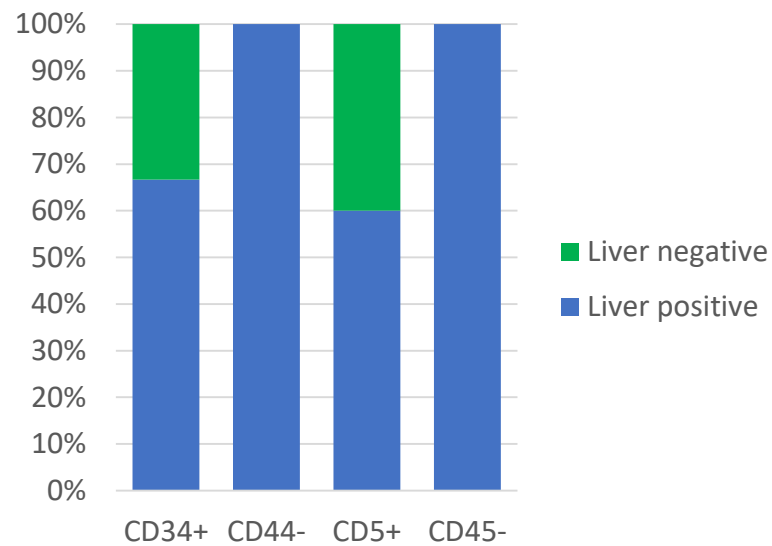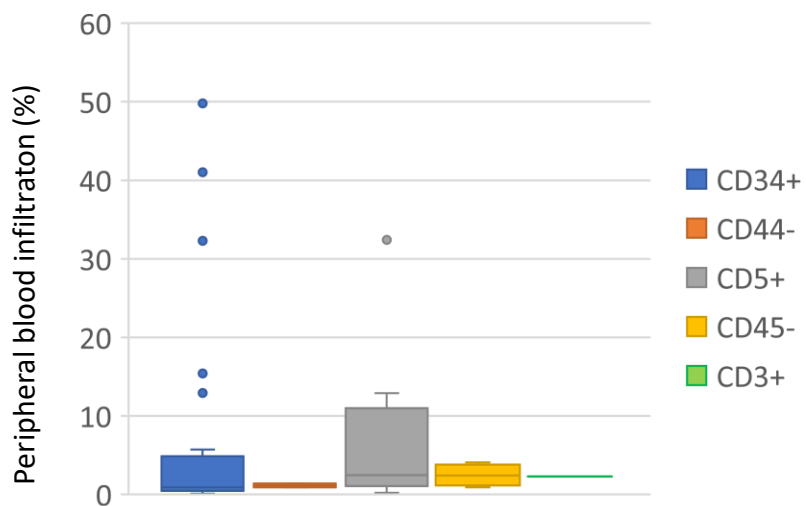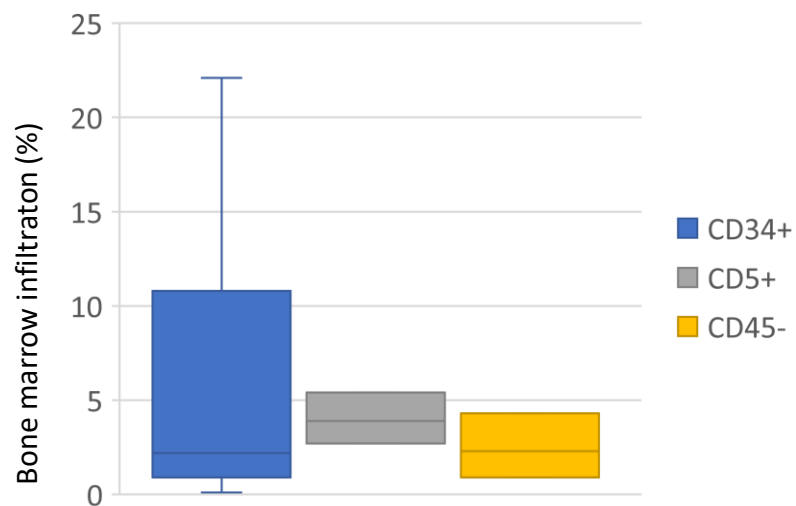

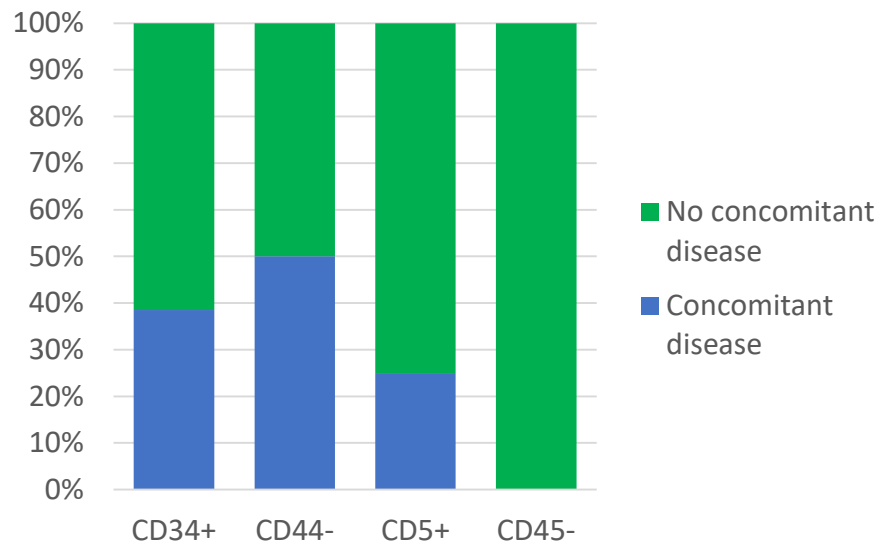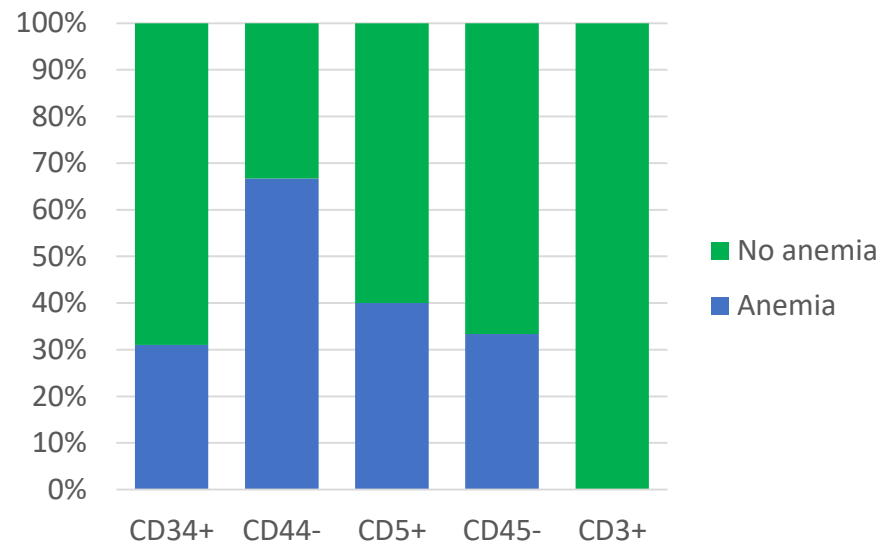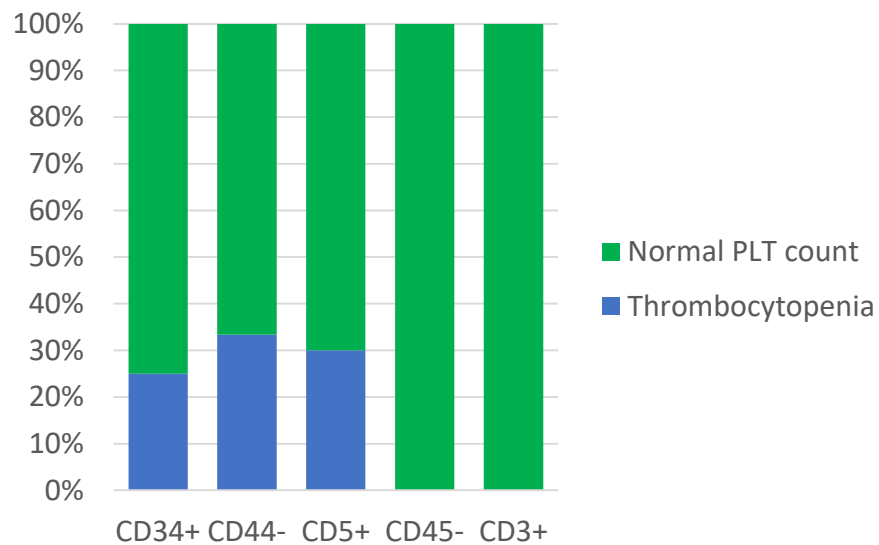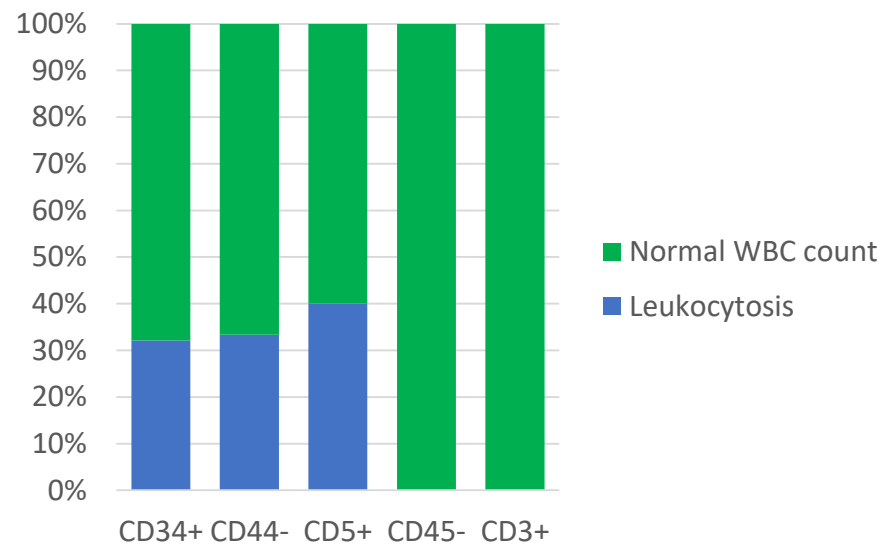

Supplement: s1 [file s1]
