# Supplementary material for: Clinical and Clinical Pathological Presentation of 310 Dogs Affected by Lymphoma with Aberrant Antigen Expression Identified via Flow Cytometry
Source: MDPI journal article supplement (doi:10.3390/vetsci9040184), 2022-04-13
Supplement: s1 [file s1]

**Table S3** number and frequencies of clinical and clinical-pathological features of 54 dogs with B-cell lymphoma with aberrant antigen expression.

|                        | Number of aberrant cases out of total cases tested for the antigen |       |       |       |      |      |      |
|------------------------|--------------------------------------------------------------------|-------|-------|-------|------|------|------|
|                        | CD34+                                                              | CD44- | CD5+  | CD45- | CD3+ | CD4+ | CD8+ |
| Pure breed             | 24/40                                                              | 5/15  | 10/40 | 4/41  | 0/24 | 1/30 | 1/30 |
| Mixed breed            | 7/9                                                                | 0/3   | 2/9   | 0/9   | 0/5  | 0/5  | 0/5  |
| Males                  | 19/28                                                              | 2/10  | 5/28  | 4/29  | 0/17 | 1/21 | 0/21 |
| Females                | 12/22                                                              | 3/9   | 7/22  | 1/22  | 0/13 | 0/15 | 1/15 |
| Substage a             | 17/27                                                              | 3/12  | 7/27  | 1/27  | 0/16 | 1/20 | 0/20 |
| Substage b             | 5/6                                                                | 0/3   | 1/6   | 1/6   | 0/3  | 0/5  | 0/5  |
| DLBCL                  | 2/3                                                                | 0/2   | 0/3   | 1/3   | 0/2  | 0/2  | 0/2  |
| MZL                    | 2/3                                                                | 0/2   | 0/2   | 0/3   | 0/2  | 0/3  | 0/3  |
| Spleen positive        | 9/15                                                               | 1/5   | 5/15  | 1/15  | 0/6  | 0/10 | 0/10 |
| Spleen negative        | 2/2                                                                | 0/1   | 0/2   | 0/2   | 0/1  | 0/2  | 0/2  |
| Liver positive         | 6/10                                                               | 1/3   | 3/10  | 1/10  | 0/4  | 0/6  | 0/6  |
| Liver negative         | 3/5                                                                | 0/2   | 2/5   | 0/5   | 0/2  | 0/5  | 0/5  |
| No extranodal site     | 8/11                                                               | 1/7   | 2/11  | 1/11  | 0/6  | 0/9  | 0/9  |
| Skin                   | 1/1                                                                | -     | 0/1   | 0/1   | -    | 0/1  | 0/1  |
| Bowel                  | 0/1                                                                | -     | 1/1   | 0/1   | 0/1  | 0/1  | 0/1  |
| Mediastinal            | 1/1                                                                | -     | 0/1   | 1/1   | 0/1  | 0/1  | 0/1  |
| Effusion               | 0/1                                                                | 0/1   | 1/1   | 0/1   | 0/1  | 0/1  | 0/1  |
| Concomitant disease    | 5/7                                                                | 1/3   | 1/7   | 0/7   | 0/4  | 0/5  | 0/5  |
| No concomitant disease | 8/12                                                               | 1/6   | 3/12  | 1/12  | 0/7  | 0/9  | 0/9  |
| Anemia                 | 9/12                                                               | 2/5   | 4/12  | 1/12  | 0/8  | 0/8  | 0/8  |
| No anemia              | 20/29                                                              | 1/10  | 6/29  | 2/30  | 1/17 | 0/21 | 0/21 |
| Thrombocytopenia       | 7/11                                                               | 1/2   | 3/11  | 0/11  | 0/5  | 0/5  | 0/5  |
| Normal PLT count       | 21/29                                                              | 2/12  | 7/29  | 3/30  | 1/19 | 0/23 | 0/23 |
| Leukocytosis           | 9/12                                                               | 1/3   | 4/12  | 0/12  | 0/6  | 0/7  | 0/7  |
| Normal WBC count       | 19/28                                                              | 2/11  | 6/28  | 3/29  | 1/18 | 0/21 | 0/21 |

LN=lymph node. DLBCL=Diffuse Large B-Cell Lymphoma. MZL=Marginal Zone Lymphoma
